# Supplementary material for: Rhodococcus Yananensis Sp. Nov., Isolated From Microbial Fermentation Bed Material From a Pig Farm
Source: Research Square preprint supplement (doi:10.21203/rs.3.rs-1014229/v1), 2021-10-28
Supplement: Supplementary file 1 [file a3230dea5b3ffc4d64006607.docx]

*Rhodococcus yananensis* sp. nov., isolated from microbial fermentation bed material from a pig farm

Yingying Jiang **a,b,c,#**, Chaochao Zheng **a,#**, Tianfei Yu **a**, Jing Li **a**, Jiamin Ai **a**, Maiping Li d, Xiaodong Liu **a,b,c**, Zhenshan Deng **a,b,c,***

a College of Life Sciences, Yan’an University, Yan’an 716000, China

b Shaanxi Key Laboratory of Research and Utilization of Resource Plants on the Loess Plateau (Yan'an University), Yan’an 716000, China

c Shaanxi Engineering and Technological Research Center for Conversation and Utilization of Regional Biological Resources, Yan’an University, Yan’an 716000, China

d Animal Husbandry and Veterinary Service Center ,Yan’an 716000,China

**#** These authors have contributed equally to this work.

***Correspondence:** [zhenshandeng214@163.com](mailto:zhenshandeng214@163.com)

**Table S1.** The comparative analysis of this 16S rRNA gene sequence (1366 bp) and those available from EzBioCloud server indicated that FCM22-1T is clearly related to members of the genus *Rhodococcus*. The similarity results of the first 15 strains are as follows, with ranging from 95 to 98%.

| Top-hit taxon | Top-hit strain(T) | Similarity (%) |
| --- | --- | --- |
| *Rhodococcus zopfii* | NBRC 100606 | |97.95 |
| *Rhodococcus rhodochrous* | NBRC 16069 | 97.73 |
| *Rhodococcus biphenylivorans* | TG9 | 97.66 |
| *Rhodococcus artemisiae* | YIM 65754 | 97.58 |
| *Rhodococcus phenolicus* | DSM 44812 | 97.44 |
| *Rhodococcus aetherivorans* | 10bc312 | 97.41 |
| *Rhodococcus gordoniae* | DSM 44689 | 97.36 |
| *Rhodococcus ruber* | DSM 43338 | 97.29 |
| *Rhodococcus pyridinivorans* | DSM 44555 | 97.29 |
| *Rhodococcus lactis* | DW151B | 97.29 |
| *Rhodococcus electrodiphilus* | JC435 | 97.28 |
| *Rhodococcus coprophilus* | NBRC 100603 | 96.78 |
| *Rhodococcus rhodnii* | NBRC 100604 | 96.55 |
| *Rhodococcus triatomae* | DSM 44892 | 96.55 |
| *Rhodococcus olei* | Ktm-20 | 96.33 |

**Table S2.** A part of physiological characteristics of strain FBM22-1T.

| Characteristics |  | FBM22-1T |
| --- | --- | --- |
| antibiotic | penicillin | 1.31cm |
|  | ampicillin | 1.35cm |
|  | ceftriaxone | 1.40cm |
|  | gentamicin | 0.75cm |
|  | tetracycline | 0.60cm |
|  | erythromycin | 0.50cm |
|  | ciprofloxacin | 0.81cm |
|  | lincomycin | － |
|  | sulfamethoxazole tablets | － |
|  | chloramphenicol | 1.31cm |
| Nitrate reduction |  | ＋ |
| H2S production |  | － |
| denitrification |  | ＋ |
| Indole production |  | w |
| MR-VP | MR | － |
|  | VP | － |
| Optimum pH for growth |  | 7 |
| Optimum temperature for growth (℃) |  | 30-37 |
| Optimum temperature for (w/v) NaCl |  | 0.50% |

**Table S3.** ANIb, ANIm and DDH value (%) of strain FBM22-1T with its phylogenetically related species.

Strains: 1, *Rhodococcus yananensis* FBM22-1T; 2, *Rhodococcus zopfii* NBRC 100606T; 3, *Rhodococcus rhodochrous* NBRC 16069T; 4, *Rhodococcus biphenylivorans* TG9T.

| Speces name |  | ANIb |  | ANIm |  | DDH |  | G+C% |
| --- | --- | --- | --- | --- | --- | --- | --- | --- |
|  |  | 1 |  | 1 |  | 1 |  |  |
| 1 |  | * |  | * |  | 100 |  | 68.64 |
| 2 |  | 78.88 |  | 85.57 |  | 26.8 |  | 70 |
| 3 |  | 79.06 |  | 85.77 |  | 26.9 |  | 68.2 |
| 4 |  | 78.93 |  | 85.66 |  | 26.9 |  | 62.8 |
